# Supplementary material for: Extracellular interactions and ligand degradation shape the nodal morphogen gradient
Source: eLife. 2016 Apr 21;5:e13879. doi: 10.7554/eLife.13879 (PMC4887204; doi:10.7554/eLife.13879)
Supplement: Figure 1—source data 1. — DOI: http://dx.doi.org/10.7554/eLife.13879.004 [file elife-13879-fig1-data1.xlsx]

## Sheet: Diffusion Coefficient (Fig1f)
	Sqt-EGFP	Cyc-EGFP	Cyc-D2-EGFP	Sqt-Cyc2-EGFP	Lft1-EGFP	Lft2-EGFP	Sec-EGFP
D (mm2/s) Mean	63.9682	64.7981	60.6609	66.578	64.2978	66.3437	92.3253
SD (mm2/s)	14.4353	12.5764	9.77213	13.8461	11.7002	9.80008	18.9672
N (embryos)	29	14	11	19	15	15	18
n (measure.)	97	43	36	49	42	43	72
Individual FCS Measurements
1	70.2423	67.3509	52.2561	63.4633	64.4781	77.8299	105.912
2	73.5592	69.7559	60.2177	72.0783	61.2907	68.8236	71.5443
3	82.8817	55.3578	60.0299	58.2363	64.0867	86.237	107.738
4	68.4498	76.6563	52.7545	64.9954	34.5067	57.5226	98.8617
5	65.6029	74.4153	68.9892	87.1369	61.9789	68.8924	84.7362
6	38.331	64.7648	72.1547	90.4782	60.4026	50.9532	85.5283
7	60.6603	49.4176	61.5345	58.8978	61.1585	75.254	92.6582
8	39.759	77.7346	61.7042	57.0033	64.5615	54.9359	73.716
9	67.1666	77.3054	57.7879	70.1052	43.32	71.7295	83.8762
10	71.2197	66.4557	67.395	68.2927	69.8386	65.7047	94.0874
11	57.1819	76.3081	78.8077	73.478	73.4276	67.0728	91.0124
12	69.628	62.1946	70.1765	60.0601	35.6134	80.1827	81.1787
13	74.0369	40.6898	66.787	65.7071	83.2398	68.2139	65.449
14	92.3927	77.0784	65.2475	123.971	40.2322	89.3867	83.89
15	85.4078	43.0548	57.2584	72.7021	60.6938	73.5057	98.8045
16	52.9505	51.9609	58.13	43.8048	68.2403	79.5322	82.4457
17	51.0223	68.5602	72.7108	53.4079	54.1309	62.8155	71.2855
18	39.6773	64.4172	62.9843	48.2537	71.652	78.8866	78.5528
19	56.8417	63.5689	54.4652	70.7249	48.944	47.42	98.9762
20	76.6547	41.2533	70.9735	82.2628	75.3382	66.2452	71.6343
21	70.5675	69.7559	68.7429	78.6434	69.8487	50.6403	85.743
22	79.5109	69.7787	57.1022	77.5979	72.1788	68.4383	84.0413
23	65.6659	72.973	58.8048	53.4037	73.8847	54.9914	64.697
24	62.9349	63.0338	66.7638	59.3625	64.89	70.4016	101.365
25	47.3715	87.1951	77.3012	82.5262	67.6603	69.5246	106.087
26	58.1933	82.5777	80.4413	62.9666	60.7245	66.8171	100.886
27	46.9693	61.7408	70.3509	64.9657	59.1415	53.0496	98.1327
28	64.4349	88.4827	77.0413	55.3187	59.5826	58.2568	86.9952
29	68.3232	69.9034	62.2751	65.7603	52.9408	61.9879	83.7155
30	58.884	74.347	69.5175	69.686	71.0002	54.5418	84.5535
31	66.7962	81.0178	52.444	57.8467	76.4034	72.542	67.0819
32	71.0258	73.4964	55.8593	42.9342	54.287	53.7017	89.0635
33	88.6351	68.1436	64.3574	53.8776	78.1828	61.776	99.9304
34	81.9343	84.1401	54.9409	72.8553	73.4349	65.328	97.5986
35	50.797	66.79	64.362	64.3465	72.9888	63.5102	82.7984
36	48.9472	65.2707	7.94627	68.2728	79.0355	65.9227	105.511
37	53.5291	62.8957		63.3333	73.8782	71.6525	98.649
38	54.53	74.566		67.4602	69.2691	55.7218	104.411
39	75.425	78.7404		51.1471	77.5758	64.8603	98.989
40	78.5829	68.8247		65.8982	67.8682	74.8945	124.329
41	65.8104	58.773		62.0847	64.2978	70.3868	117.256
42	78.5167	68.067		57.2469	11.7002	66.3437	99.4919
43	70.1822	11.4631		69.1371		9.80008	113.518
44	52.6592			57.3939			114.422
45	76.25			66.5682			120.335
46	65.5914			61.9795			113.698
47	58.2935			91.4949			117.033
48	59.8458			66.578			84.7031
49	60.2151			13.8461			122.63
50	79.2943						112.864
51	60.6319						111.375
52	69.5723						114.727
53	61.5333						91.059
54	74.5402						114.392
55	59.9394						106.239
56	70.7654						99.3446
57	61.8206						107.997
58	56.4971						86.7324
59	68.2192						102.884
60	64.1806						119.137
61	69.7222						91.4456
62	61.153						113.909
63	75.4814						88.5327
64	47.4186						81.1758
65	55.6569						118.743
66	50.5158						100.654
67	57.2258						99.446
68	44.8281						81.9167
69	67.0241						92.6651
70	44.3204						59.4371
71	59.5414						95.489
72	73.8242						15.5717
73	69.357
74	62.4304
75	76.7466
76	51.4857
77	40.5956
78	62.0523
79	64.5802
80	70.3835
81	61.573
82	73.8493
83	77.149
84	83.2464
85	90.7138
86	96.5054
87	57.3253
88	90.5803
89	86.5756
90	75.157
91	86.4366
92	75.1177
93	90.5803
94	88.8247
95	63.568
96	66.3435
97	13.1109
