# Supplementary material for: Extracellular interactions and ligand degradation shape the nodal morphogen gradient
Source: eLife. 2016 Apr 21;5:e13879. doi: 10.7554/eLife.13879 (PMC4887204; doi:10.7554/eLife.13879)
Supplement: Figure 4—source data 1. — DOI: http://dx.doi.org/10.7554/eLife.13879.009 [file elife-13879-fig4-data1.xlsx]

## Sheet: Gradient1 Data (Fig4b)
	Normalized intensities
	Sqt-EGFP (n=14)		Cyc-EGFP (n=14)		SqtCyc2EGFP (n=12)		CycD2EGFP (n=11)
Distance from Source (mm)	Mean	s.e.m	Mean	s.e.m	Mean	s.e.m	Mean	s.e.m
0	1	0	1	0	1	0	1	0
5.5	0.811273	0.040338	0.766973	0.0459734	0.78898	0.0366571	0.855005	0.0333328
11	0.746756	0.0489792	0.638638	0.0982161	0.699373	0.0465264	0.774586	0.0370342
16.5	0.77278	0.0583655	0.486094	0.0905368	0.66755	0.0620706	0.717707	0.0741092
22	0.724035	0.0542841	0.488891	0.109736	0.636378	0.0513506	0.65782	0.0870694
27.5	0.684226	0.0469534	0.377663	0.0868634	0.613846	0.0439116	0.557218	0.104131
33	0.630142	0.0440077	0.342092	0.0764815	0.601185	0.0589849	0.497173	0.0905
38.5	0.603339	0.0473588	0.369086	0.0837278	0.58623	0.0681834	0.447293	0.0812843
44	0.610759	0.0481764	0.240674	0.0691444	0.553978	0.0514835	0.48318	0.0700845
49.5	0.589496	0.0426429	0.226542	0.0542329	0.512631	0.0449116	0.46107	0.0821
55	0.552947	0.0494226	0.226202	0.0656442	0.522191	0.0658941	0.397253	0.0643806
60.5	0.550332	0.0424211	0.216778	0.0557459	0.498483	0.0515931	0.435066	0.0601778
66	0.5401	0.0448712	0.227124	0.0743032	0.484668	0.0454524	0.374406	0.0553385
71.5	0.530819	0.0452747	0.160353	0.046446	0.457971	0.0294086	0.416631	0.0448344
77	0.522934	0.0351963	0.209725	0.0595512	0.457897	0.0489549	0.494172	0.0814378
82.5	0.531893	0.0381698	0.184338	0.0521399	0.42101	0.0414684	0.351929	0.0562389
88	0.504915	0.042958	0.181058	0.0481509	0.439415	0.0429592	0.384061	0.0586743
93.5	0.48965	0.0416087	0.171078	0.0573789	0.452194	0.0445065	0.324605	0.0572976
99	0.467039	0.0428179	0.185706	0.050012	0.497638	0.0558271	0.317902	0.0729358
104.5	0.460496	0.0425913	0.208437	0.0595829	0.438058	0.0471186	0.272657	0.0494795
110	0.469145	0.0484535	0.177805	0.0570689	0.431979	0.0465655	0.264771	0.0536658
115.5	0.485863	0.0482562	0.214153	0.0588307	0.434778	0.0514518	0.318727	0.0659451
121	0.486806	0.0449517	0.188999	0.0582469	0.429139	0.0421626	0.331347	0.0638467
126.5	0.477908	0.0396717	0.177679	0.0481846	0.410458	0.0533343	0.301377	0.0619732
132	0.473256	0.0390711	0.16539	0.0533832	0.436405	0.0389584	0.250425	0.0544086
137.5	0.444496	0.0392874	0.183684	0.0497106	0.408977	0.0552951	0.337412	0.0748373
143	0.432406	0.0394098	0.172308	0.0501334	0.391435	0.052332	0.269482	0.0677709
148.5	0.425796	0.0386763	0.151973	0.0436137	0.383274	0.0493633	0.283353	0.0471742
Fittings
	f(x) = a*exp(-b*x)+c				decay (mm)
	a	b	c		to 1/e
Sqt-EGFP	0.5344	0.03383	0.4645		29.5596
Cyc-EGFP	0.8208	0.0509	0.1789		19.6464
Sqt-Cyc2-EGFP	0.5659	0.04375	0.433		22.8571
Cyc-D2-EGFP	0.7029	0.03208	0.2967		31.1721

## Sheet: Western Blot Quanti.(Fig4d,S2)
Each experiment was repeated three times (n = 3, supp figure 2)
	Normalized band intensity (To GFP & To 0h)
	0	1.5	3	6	12	24	48	(h)
Cyc-3xFLAG	1	0.87836	0.682467	0.61864	0.554008	0.26589	0.140227
Cyc-D2-3xFLAG	1	0.944255	0.920222	0.891971	0.687719	0.382982	0.220032
Sqt-Cyc2-3xFLAG	1	1.09124	0.699481	0.758936	0.626845	0.47876	0.278981
Sqt-3xFLAG	1	0.974943	1.0378	1.18768	0.911089	0.982776	0.944837
Lft1-3xFLAG	1	0.968718	0.866283	0.923632	1.09437	1.03179	0.866464
Lft2-3xFLAG	1	0.993238	0.987346	0.911734	0.826312	0.892214	0.764298
sec-EGFP-3xFLAG	1	0.947283	0.812312	0.868426	1.02324	1.16526	0.845026
	SD of Mean (of Normalized band intensity)
	0	1.5	3	6	12	24	48	(h)
Cyc-3xFLAG	0	0.0424149	0.0574391	0.0170032	0.0787908	0.0925578	0.0378842
Cyc-D2-3xFLAG	0	0.0914678	0.108255	0.125746	0.113206	0.0236282	0.0750629
Sqt-Cyc2-3xFLAG	0	0.0814649	0.11727	0.0905828	0.244761	0.103955	0.105704
Sqt-3xFLAG	0	0.0974277	0.0358734	0.0681926	0.0193741	0.0647508	0.0614339
Lft1-3xFLAG	0	0.0475855	0.0643123	0.157306	0.160158	0.191409	0.206612
Lft2-3xFLAG	0	0.148078	0.0975494	0.0130837	0.131614	0.14168	0.135341
sec-EGFP-3xFLAG	0	0.11248	0.053225	0.0768012	0.116864	0.18643	0.0435998
	Degradation rate & Half-life (Equation see supp fig 2)
	R square	k (/h)	t (h)		k (10-4s-1)
Cyc-3xFLAG	0.9739	0.05974	11.6027		0.165944
Cyc-D2-3xFLAG	0.99	0.03336	20.7778		0.0926667
Sqt-Cyc2-3xFLAG	0.9163	0.03256	21.2883		0.0904444
Sqt-3xFLAG	0.05675	0.0009645	718.66		0.00267917
Lft1-3xFLAG	0.1698	0.001796	385.939		0.00498889
Lft2-3xFLAG	0.8572	0.006206	111.69		0.0172389
sec-EGFP-3xFLAG	0.05387	0.001515	457.523		0.00420833
