# Supplementary figures and images for: Extracellular interactions and ligand degradation shape the nodal morphogen gradient
Source: eLife journal article supplement (doi:10.7554/elife.13879), 2016-04-21

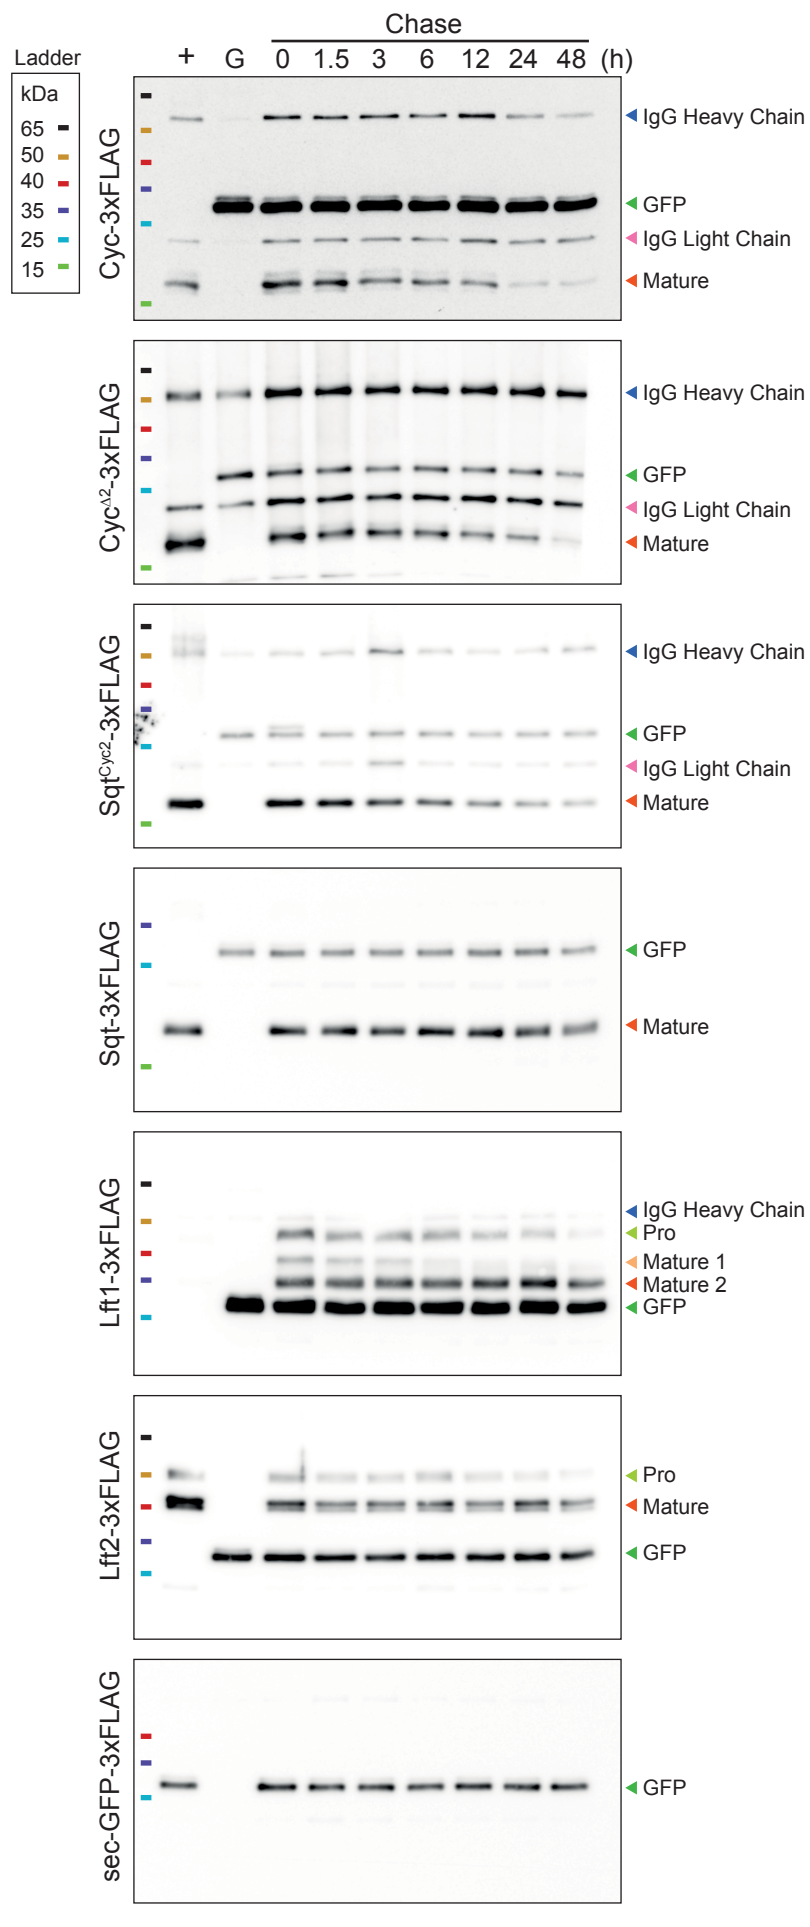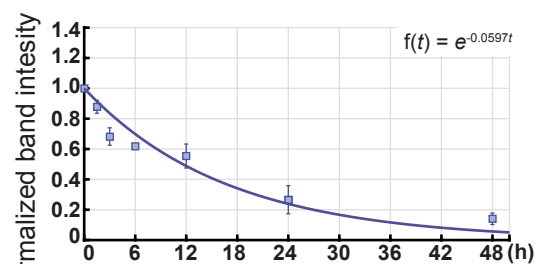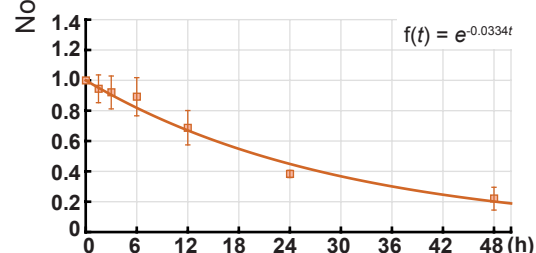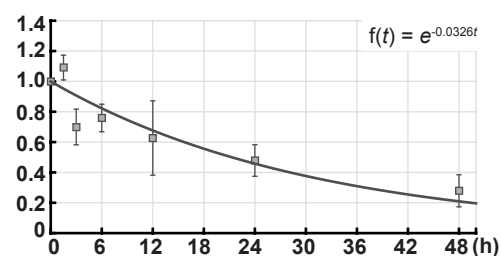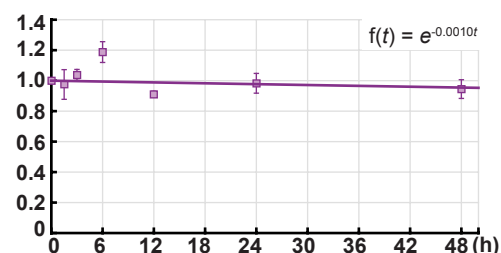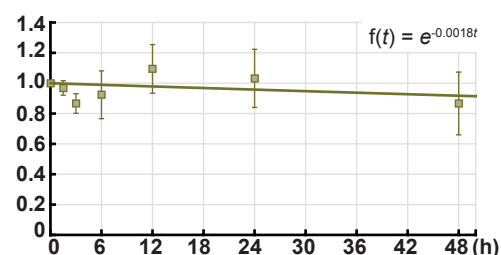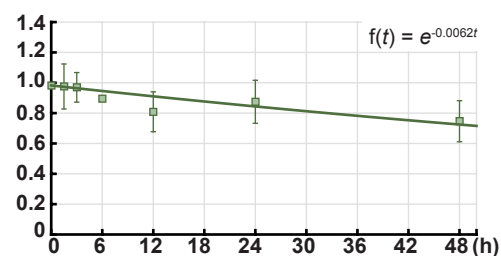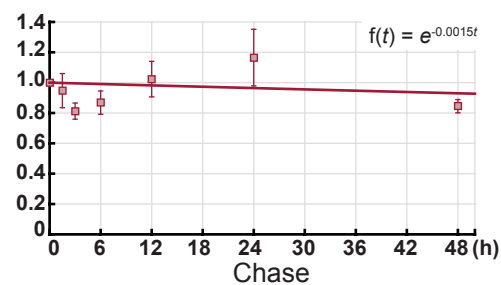

Supplement: supp [file elife-13879-supp-v1.zip]

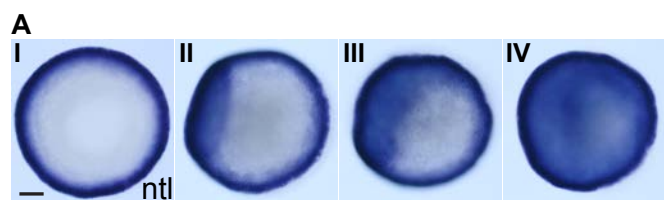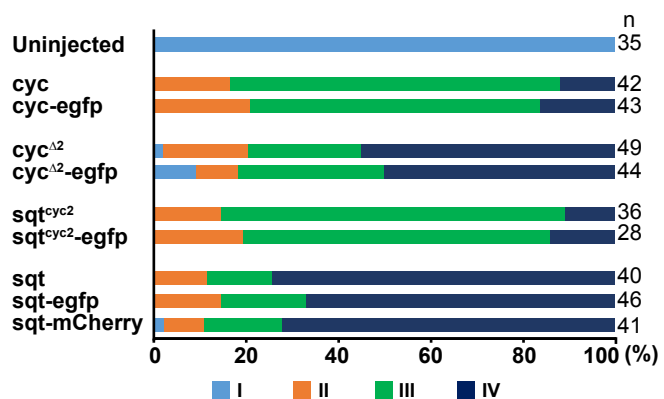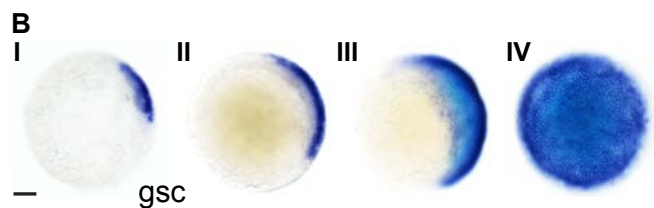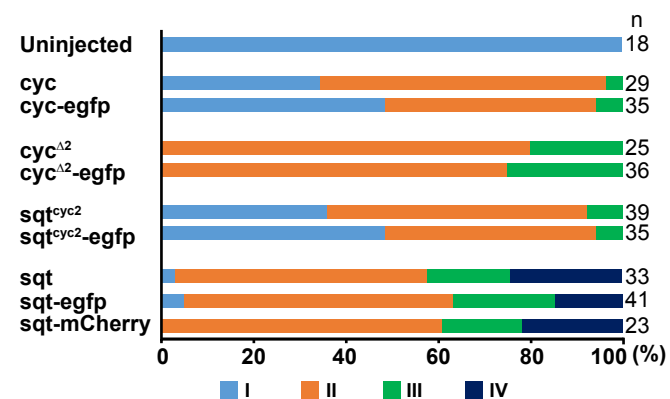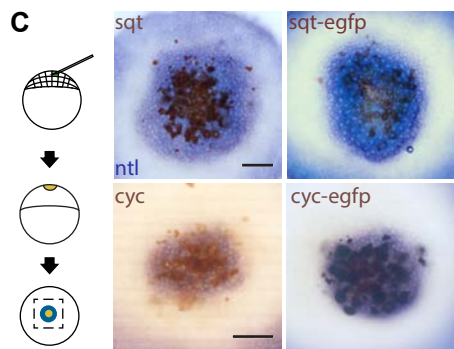

Supplement: supp [file elife-13879-supp-v1.zip]
